# Supplementary material for: Multiscale Trend Analysis for Pampa Grasslands Using Ground Data and Vegetation Sensor Imagery
Source: MDPI journal article supplement (doi:10.3390/s150717666), 2015-07-21
Supplement: s1 [file s1]

*Supplementary Information***Multiscale Trend Analysis for Pampa Grasslands Using Ground Data and Vegetation Sensor Imagery. *Sensors* 2015, 15, 17666-17692****Fernando C. Scottá \* and Eliana L. da Fonseca**

Department of Geography, Federal University of Rio Grande do Sul, Porto Alegre 91501-970, RS, Brazil; E-Mail: eliana.fonseca@ufrgs.br

\* Author to whom correspondence should be addressed; E-Mail: fernando.scotta@ufrgs.br; Tel.: +55-51-3308-6343.

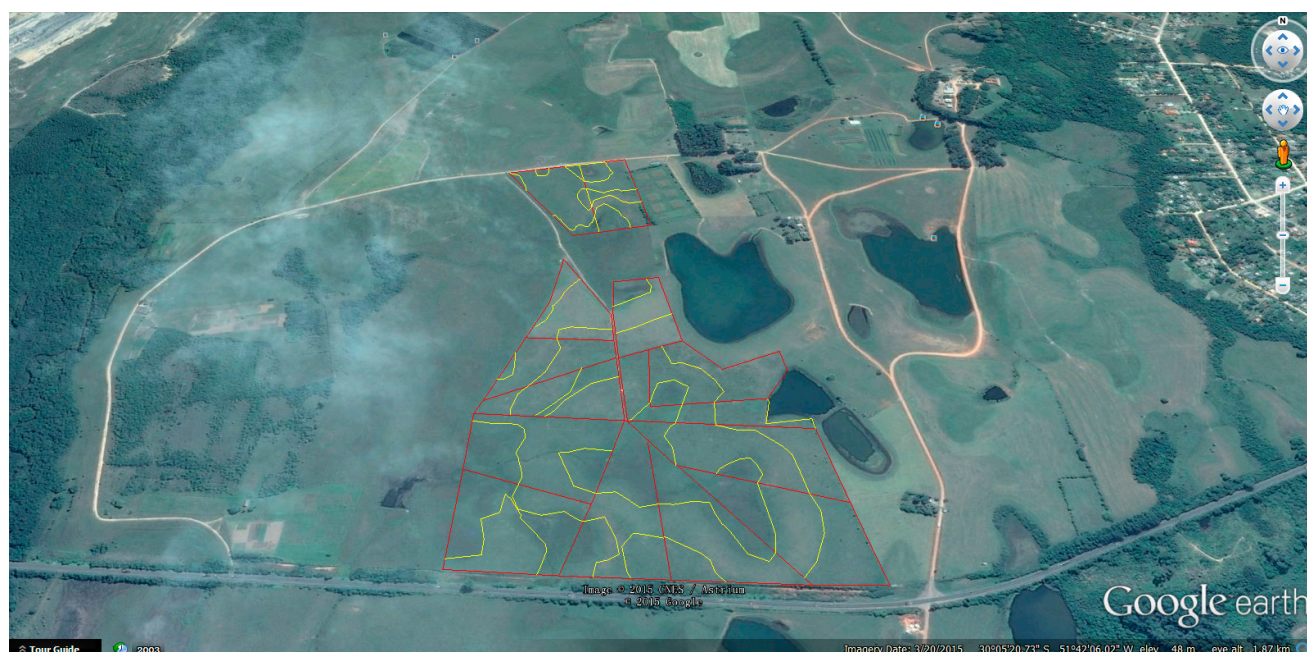

**Figure S1.** Local Scale Plots: location of long-term experiment where the ANPP dataset were collected.

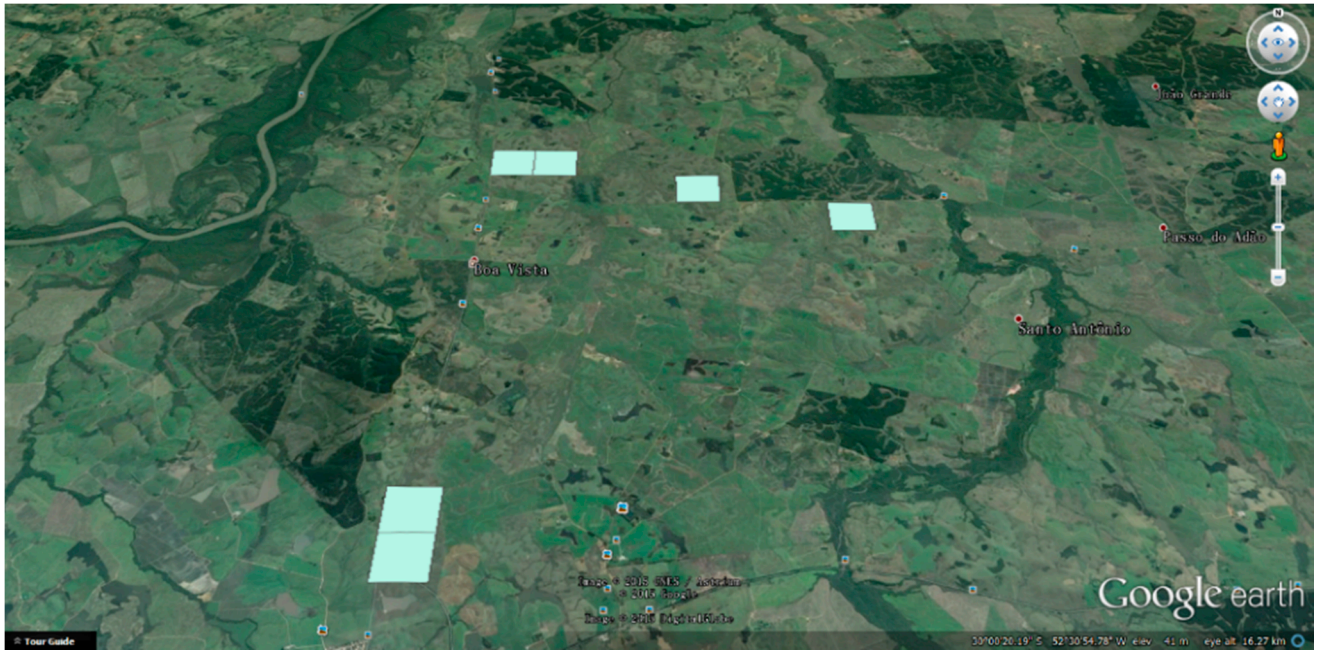

**Figure S2.** Regional Scale Plots: six areas used for monitoring at the regional scale.

© 2015 by the authors; licensee MDPI, Basel, Switzerland. This article is an open access article distributed under the terms and conditions of the Creative Commons Attribution license (<http://creativecommons.org/licenses/by/4.0/>).
